# Supplementary material for: Moderate hyperglycemia suppresses melanoma metastasis to liver
Source: PubMed Central journal article supplement — Exp Anim. 2022 Oct 27;72(2):183–92. doi: 10.1538/expanim.22-0078 (PMC10202721; doi:10.1538/expanim.22-0078), 2022-10-27
Supplement: expanim-72-183-s001.pdf [file expanim-72-183-s001.pdf]

Supplementary data

Supplementary Table 1. Primer sequences of genes used in quantitative RT-PCR

|                               | Forward Primer Sequence         | Reverse Primer Sequence          |
|-------------------------------|---------------------------------|----------------------------------|
| <i>Gapdh</i>                  | 5'- TGTGTCCGTCGTGGATCTGA-3'     | 3'- CCTGCTTCACCACCTTCTTGA-5'     |
| <i>TNF<math>\alpha</math></i> | 5'- TCAGCCGATTTGCTATCTCATA-3'   | 3'- AGTACTTGGGCAGATTGACCTC-5'    |
| <i>Cxcl10</i>                 | 5'- CCAAGTGCTGCCGTCATTTTC-3'    | 3'- GGCTCGCAGGGATGATTTCAA-5'     |
| <i>F4/80</i>                  | 5'- CTTTGGCTATGGGCTTCCAGTCC -3' | 5'- GCAAGGAGGACAGAGTTTATCGTG -3' |
| <i>CD68</i>                   | 5'- ACTTCGGGCCATGTTTCTCT -3'    | 5'- GCTGGTAGGTTGATTGTCGT -3'     |
| <i>CD86</i>                   | 5'- CATGGGCTTGGCAATCCTTA -3'    | 5'-AAATGGGCACGGCAGATATG -3'      |
| <i>CD206</i>                  | 5'- ATGCCAAGTGGGAAAATCTG -3'    | 5'- TGTAGCAGTGGCCTGCATAG -3'     |
